# Supplementary material for: A Lamellar Zn-Based Coordination Polymer Showing Increasing Photoluminescence upon Dehydration
Source: MDPI journal article supplement (doi:10.3390/molecules28155643), 2023-07-25
Supplement: s1 [file s1]

# A Lamellar Zn-Based Coordination Polymer Showing Increasing Photoluminescence upon Dehydration

Oier Pajuelo-Corral <sup>1</sup>, Jose Angel García <sup>2</sup>, Oscar Castillo <sup>3,4</sup>, Antonio Luque <sup>3,4</sup>, Claudio Mendicute-Fierro <sup>1</sup>, Antonio Rodríguez-Diéguez <sup>5</sup> and Javier Cepeda <sup>1,\*</sup>

<sup>1</sup> Departamento de Química Aplicada, Facultad de Química, Universidad del País Vasco/Euskal Herriko Unibertsitatea (UPV/EHU), 20018 Donostia, Spain; oier.pajuelo@ehu.eus (O.P.-C.); claudio.mendicute@ehu.eus (C.M.-F.)

<sup>2</sup> Departamento de Física, Facultad de Ciencia y Tecnología, Universidad del País Vasco/Euskal Herriko Unibertsitatea (UPV/EHU), 48940 Leioa, Spain; joseangel.garcia@ehu.eus

<sup>3</sup> Departamento de Química Orgánica e Inorgánica, Facultad de Ciencia y Tecnología, Universidad del País Vasco/Euskal Herriko Unibertsitatea (UPV/EHU), 48940 Leioa, Spain; oscar.castillo@ehu.eus (O.C.); antonio.luque@ehu.eus (A.L.)

<sup>4</sup> BCMaterials, Basque Center for Materials, Applications and Nanostructures, UPV/EHU Science Park, 48940 Leioa, Spain

<sup>5</sup> Departamento de Química Inorgánica, Facultad de Ciencias, Universidad de Granada, 18071 Granada, Spain; antonio5@ugr.es

\* Correspondence: javier.cepeda@ehu.es; Tel.: +34-943015409

## Contents:

- S1. Structural details.
- S2. Continuous Shape Measurements (CShMs).
- S3. Powder X-ray Diffraction Analysis.
- S4. Study of the dehydration reversibility of compound **1<sub>an</sub>**.
- S5. FT-IR spectroscopy.
- S6. Photoluminescence measurements and calculations.

## S1. Additional structural details.

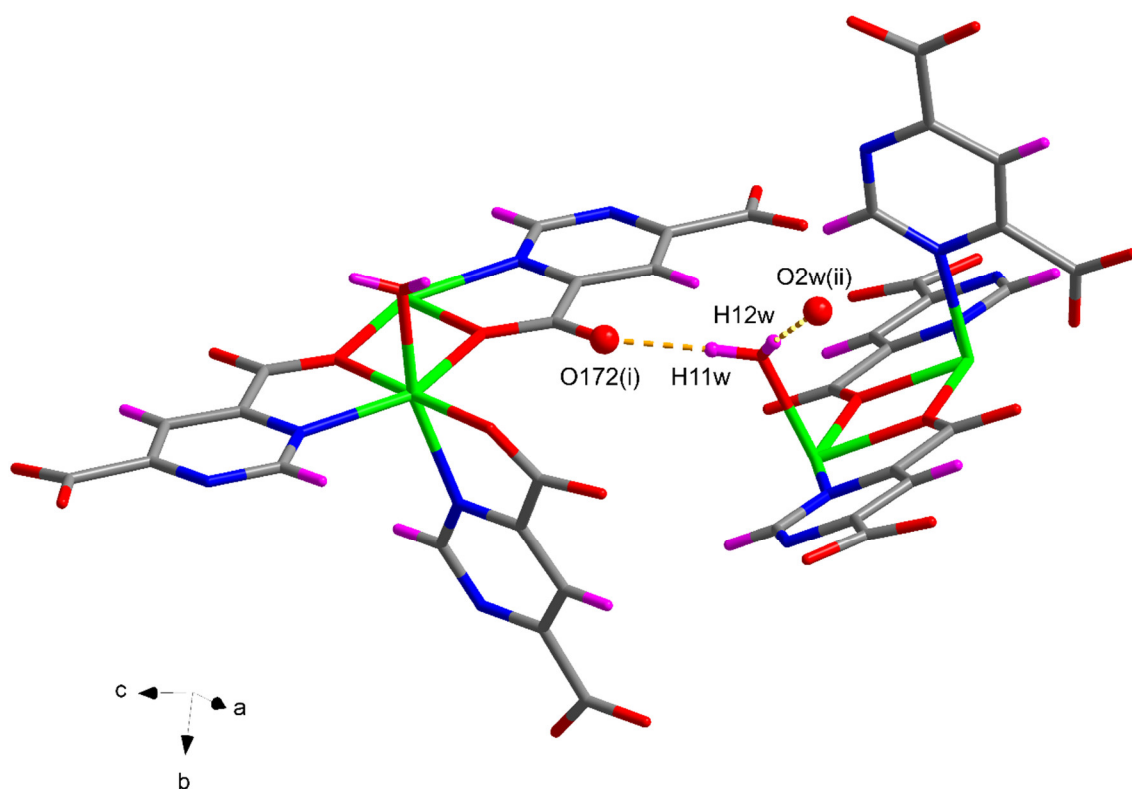

**Figure S1.** Representation of the C ligand bonds.

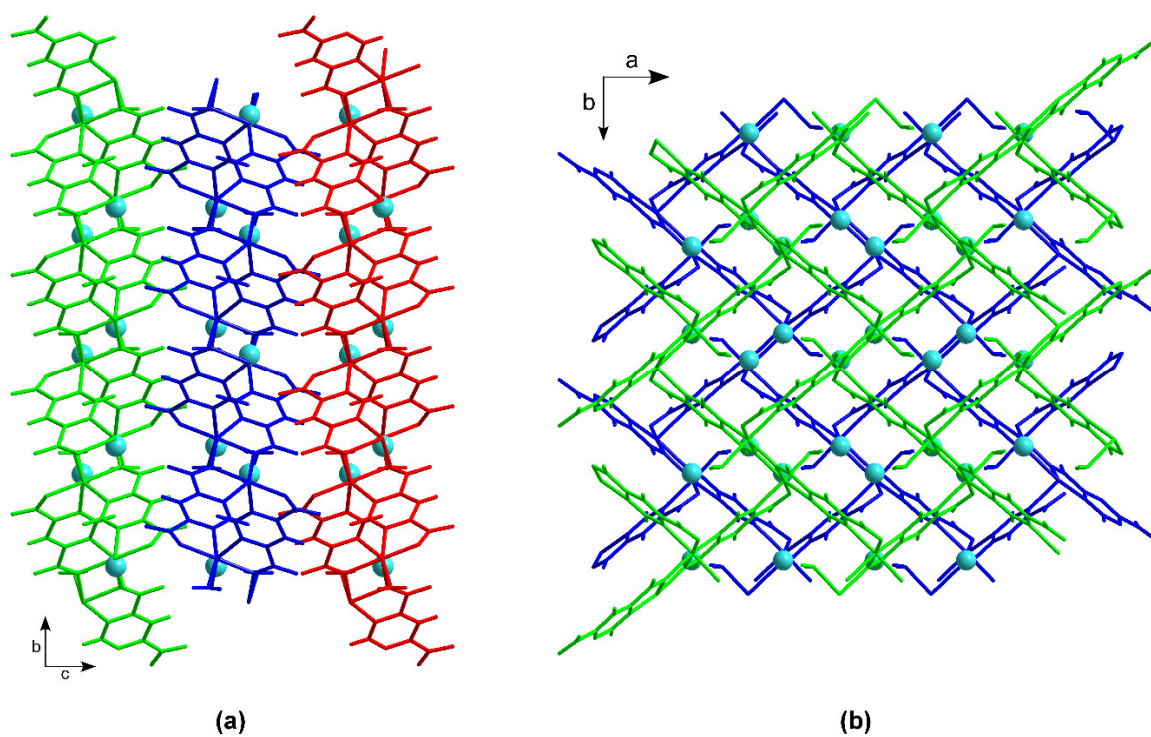

**Figure S2.** Packing of compound 1 along the (a) *a* axis and (b) *c* axis viewing directions.

**Table S1.** Hydrogen bonding interactions (Å, °) of compound **1**.<sup>a</sup>

| <i>D</i> – <i>H</i> ⋯ <i>A</i> <sup>b</sup> | <i>D</i> – <i>H</i> | <i>H</i> ⋯ <i>A</i> | <i>D</i> ⋯ <i>A</i> | <i>D</i> – <i>H</i> ⋯ <i>A</i> |
|---------------------------------------------|---------------------|---------------------|---------------------|--------------------------------|
| O1w–<br>H11w⋯O172(i)                        | 0.86                | 1.87                | 2.725(4)            | 177.5                          |
| O1w–H12w⋯<br>O2w(ii)                        | 0.86                | 1.84                | 2.693(5)            | 169.3                          |

<sup>a</sup> Symmetry codes: (i)  $-x + 3/2, -y + 1, z + 1/2$ ; (ii)  $-x + 1, -y + 1, -z$ . <sup>b</sup> D: donor. A: acceptor.

## S2. Continuous Shape Measurements (CShMs).

**Table S2.** Continuous Shape Measurements for the coordination environment for compounds **1**. The lowest SHAPE values is shown in bold blue, indicating best fits.

### Codes:

|        |       |                               |
|--------|-------|-------------------------------|
| HP-6   | 1 D6h | Hexagon                       |
| PPY-6  | 2 C5v | Pentagonal pyramid            |
| OC-6   | 3 Oh  | Octahedron                    |
| TPR-6  | 4 D3h | Trigonal prism                |
| JPPY-6 | 5 C5v | Johnson pentagonal pyramid J2 |

| Structure [ML6]   | HP-6   | PPY-6  | OC-6         | TPR-6  | JPPY-6 |
|-------------------|--------|--------|--------------|--------|--------|
| <b>Comp 1-Zn1</b> | 32.557 | 21.916 | <b>2.907</b> | 11.294 | 25.502 |

### S3. Powder X-ray Diffraction Analysis.

As observed in Figure S3, the diffraction pattern acquired on the polycrystalline sample obtained by solvent-free procedure fits perfectly the unit cell parameters (and calculated Bragg positions) of the single-crystal data, which confirms the purity of the sample.

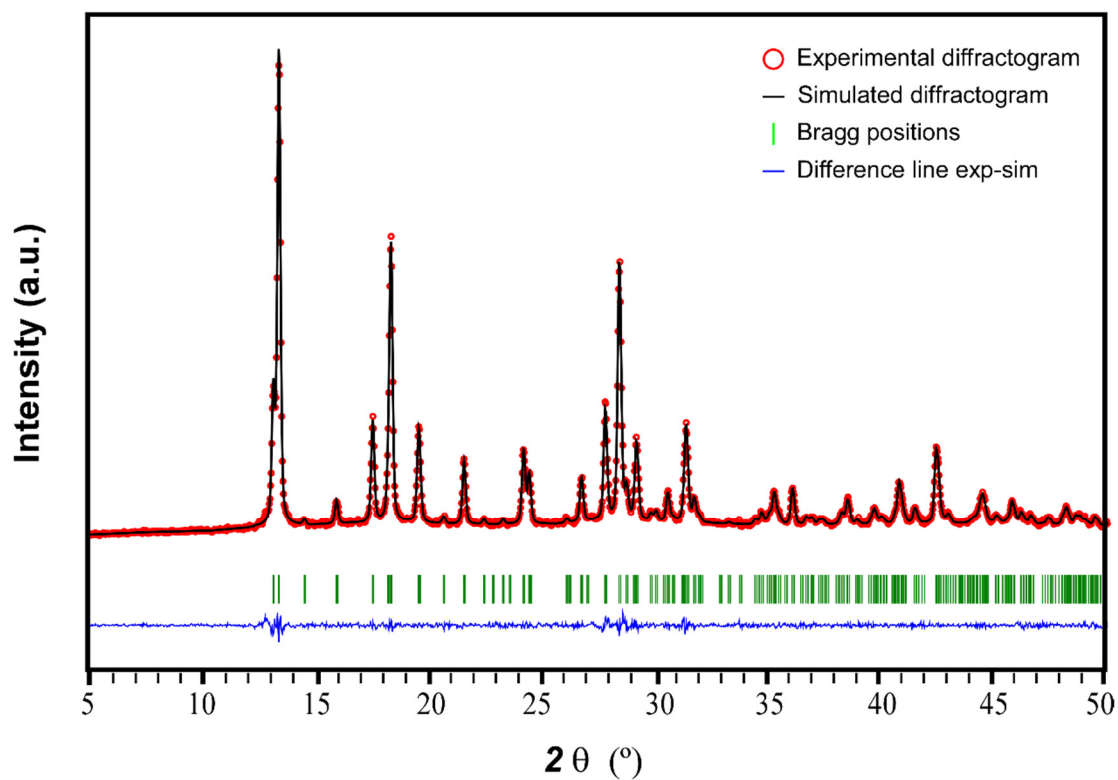

**Figure S3.** Pattern-matching analysis of polycrystalline sample of compound 1.

#### S4. Study of the dehydration reversibility of compound **1<sub>an</sub>**.

With the aim of checking if the completely anhydrous compound **1<sub>an</sub>** can revert back to compound **1** by means of a water adsorption process, we carried out a simple experiment in which the sample of **1<sub>an</sub>** was exposed to water vapor. For the experiment, we placed the sample in a small glass vial and, in turn, we placed the vial into a bigger vessel containing distilled water. The vials were left at in a sand-bath at 50 °C for 5 days, in such a way that water vapor was gently generated. Finally, the vials were open, the sample recovered and analyzed by PXRD technique, by which a similar pattern to the initial amorphous compound was obtained.

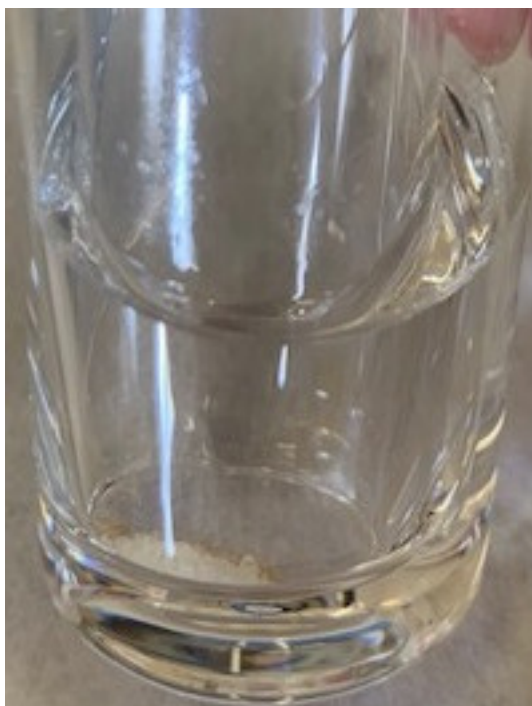

**Figure S4.** Photograph showing the exposure of sample of compound **1<sub>an</sub>** to water vapours. The sample is contained in a vial which, in turn, is placed inside a bigger vial containing water.

### S5. FT-IR spectroscopy.

Infrared spectroscopy was used as an initial characterization technique to check the presence of pmdc in compound **1** (Figure S4). The spectrum shows a wide band in the 3550-3100  $\text{cm}^{-1}$  which can be assigned to the characteristic band of OH vibrations of water molecules and to the C-H vibration of the pyrimidinic ring of pmdc. The intense peaks that appear at approximately 1650 and 1360  $\text{cm}^{-1}$  correspond to the asymmetric and symmetric stretching vibration of the carboxylate groups. In the 1300-1000 $\text{cm}^{-1}$  region several medium- and weak-intensity peaks appear that can be attributed to the distortions originated in the aromatic ring of pmdc ligand. The bands appearing below 550  $\text{cm}^{-1}$  are originated from the M-O and M-N bonds. A comparison of the FTIR spectrum with that of the free ligand can be found in Figure S5.

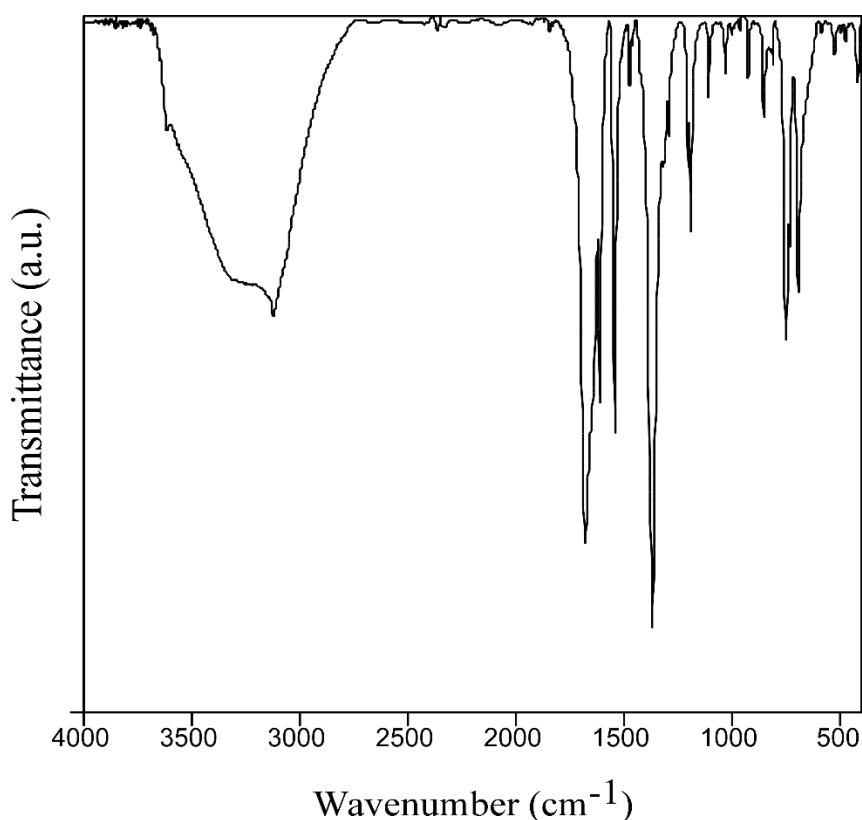

**Figure S5.** FTIR spectrum of compound **1**.

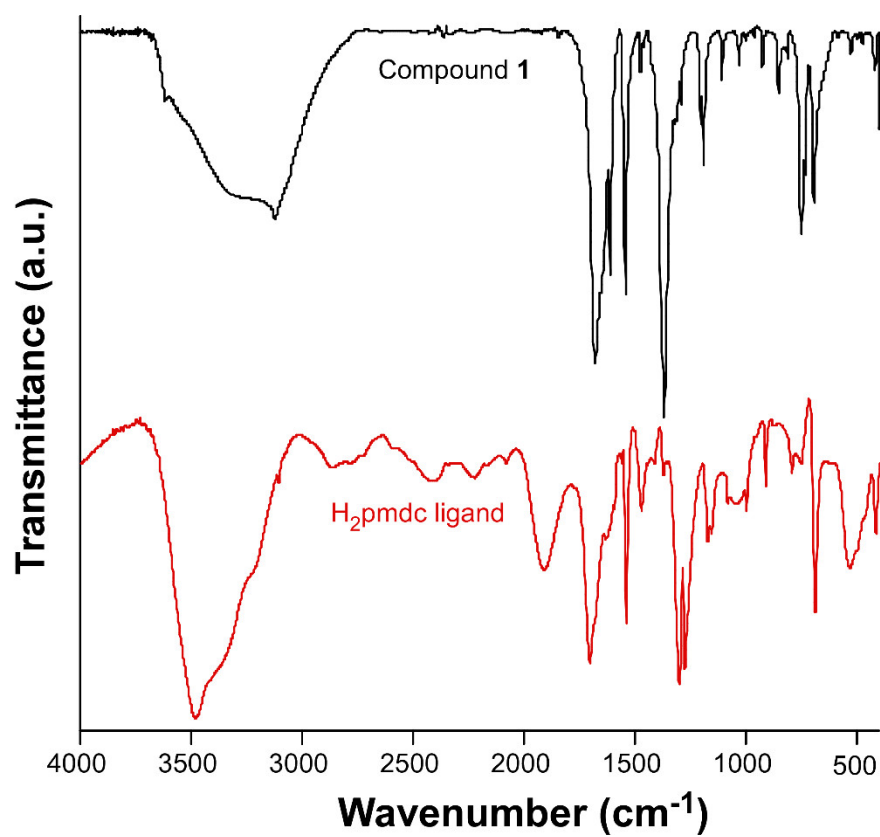

**Figure S6.** Comparison of the FTIR spectra of compound **1** and the free H<sub>2</sub>pmdc ligand.

## S6. Photoluminescence measurements and calculations.

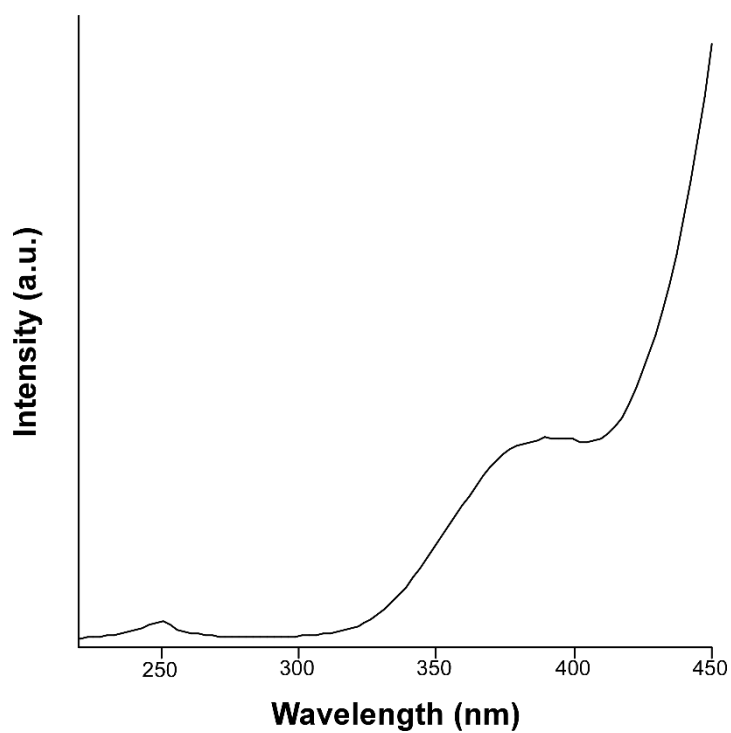

**Figure S7.** Excitation spectrum of compound **1** taken at room temperature at  $\lambda_{\text{em}} = 495$  nm.

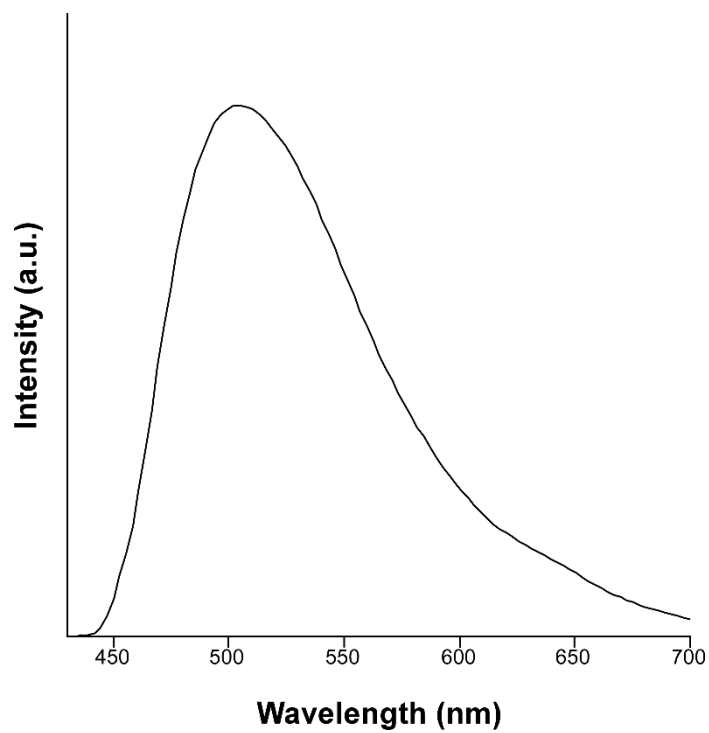

**Figure S8.** Emission spectrum of compound **1** measured at room temperature at  $\lambda_{\text{em}} = 375$  nm.



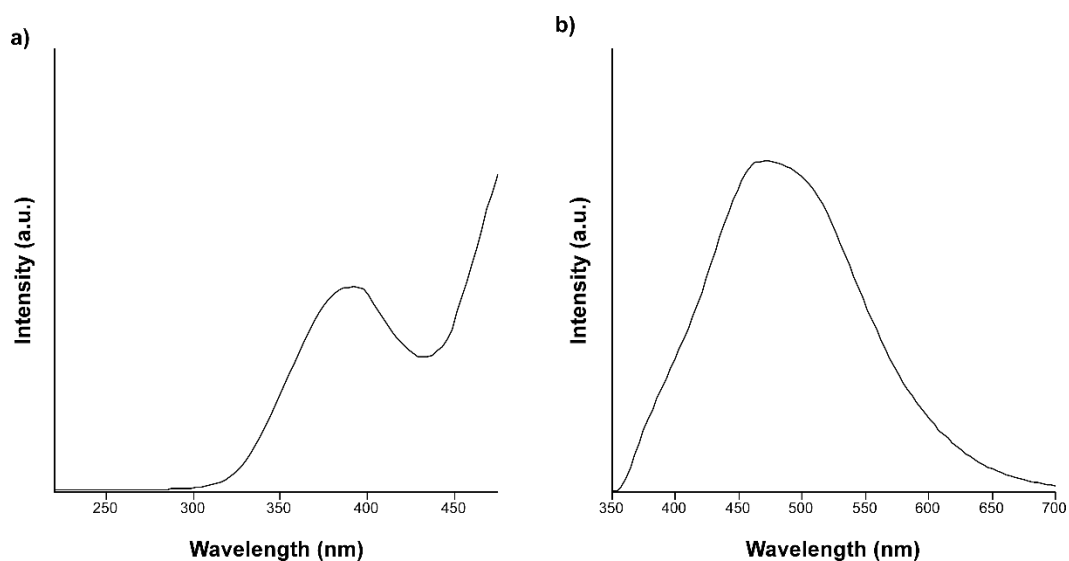

**Figure S9.** Excitation ( $\lambda_{\text{em}} = 495 \text{ nm}$ ) (a) and emission ( $\lambda_{\text{em}} = 325 \text{ nm}$ ) (b) spectra of compound **1** recorded at a temperature of 13 K.

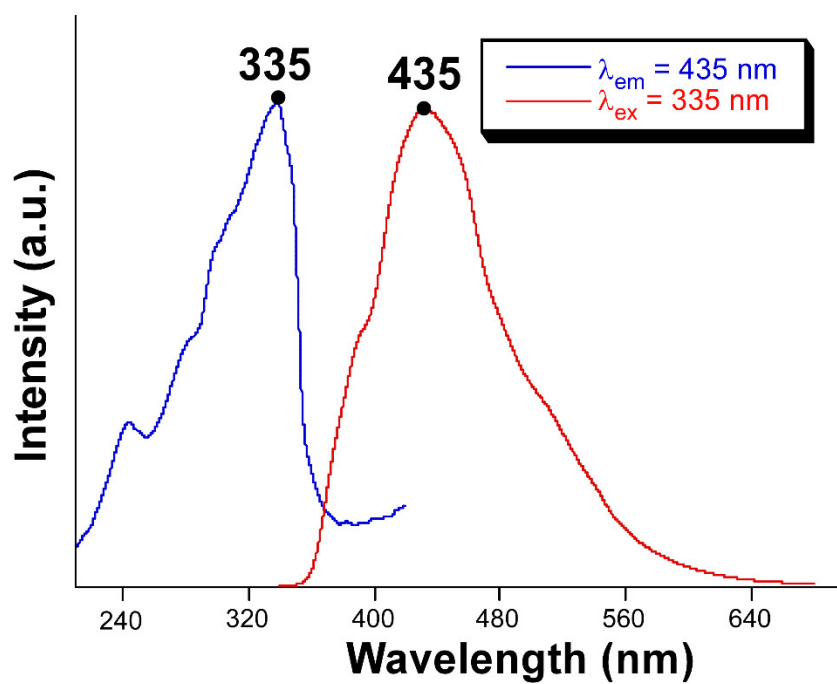

**Figure S10.** Excitation ( $\lambda_{\text{em}} = 495 \text{ nm}$ ) (a) and emission ( $\lambda_{\text{em}} = 325 \text{ nm}$ ) (b) spectra of compound **1** recorded at a temperature of 13 K.

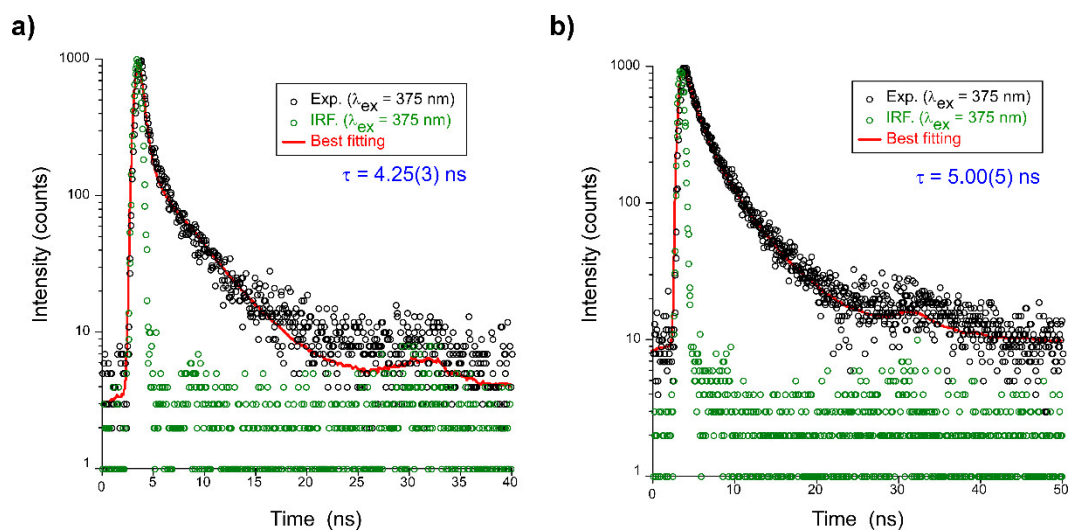

**Figure S11.** Decay curves of compound 1 recorded at a) room temperature and b) 13 K at an emission wavelength of 495 nm.

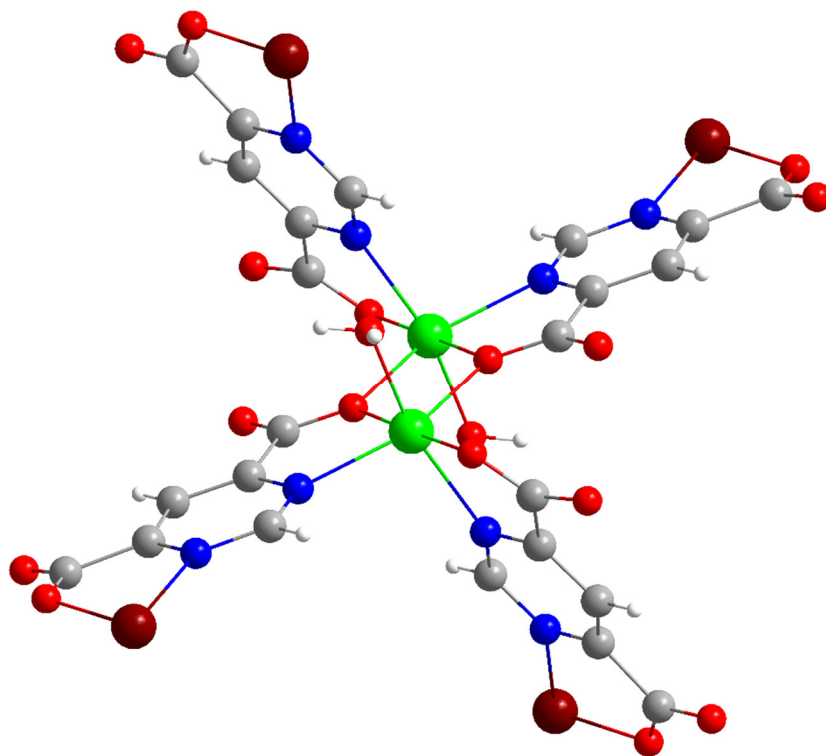

**Figure S12.** Dimeric model employed for the calculations performed with Gaussian and ORCA programs.

## Excitation

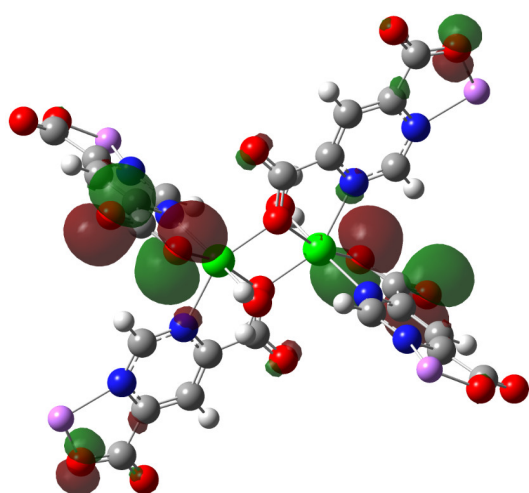

HOMO-15

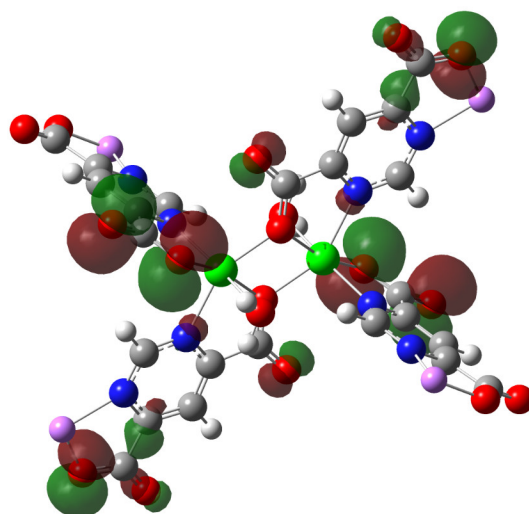

HOMO-14

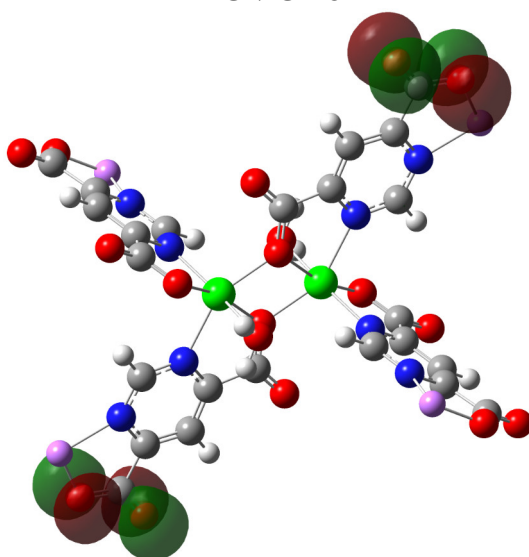

HOMO-11

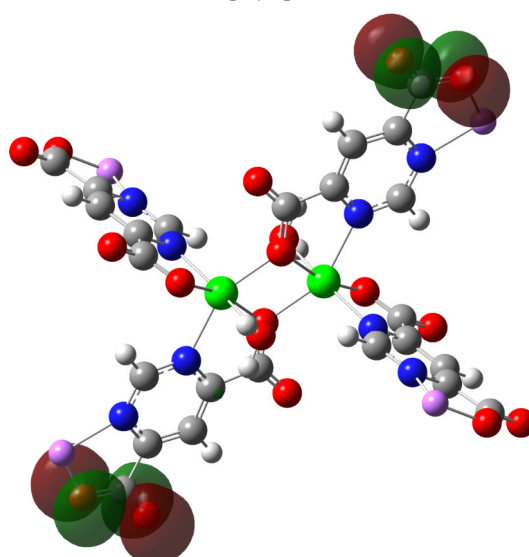

HOMO-10

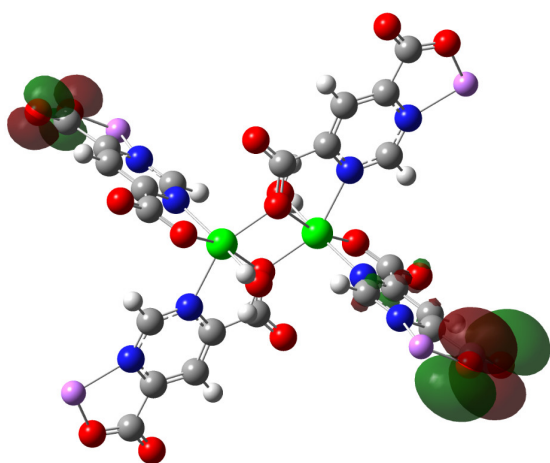

HOMO-7

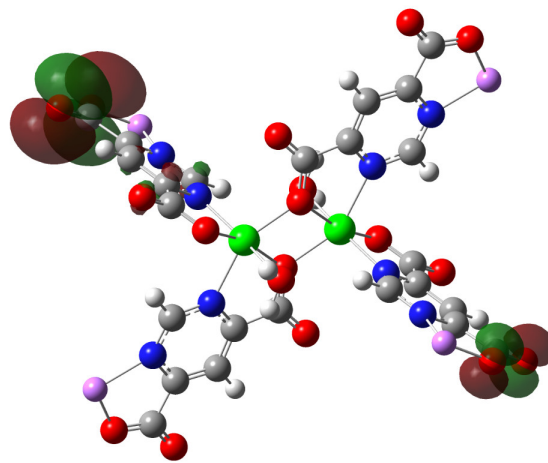

HOMO-6

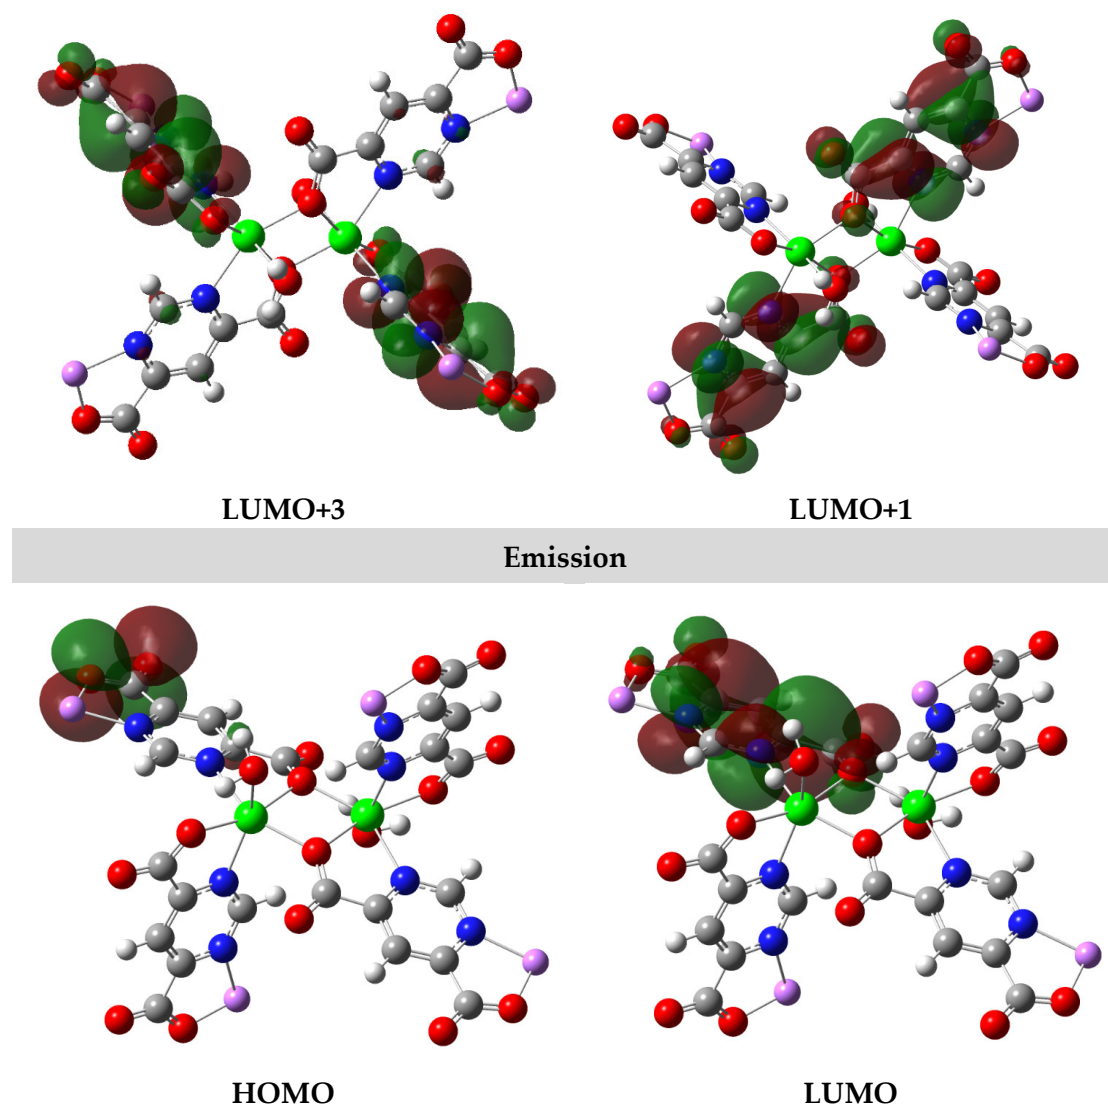

**Figure S13.** MOs of the dimeric model of compound **1** involved in the main excitation and emission.

**Table S3.** Calculated main excitation and emission energies (nm), singlet electronic transitions and associated oscillator strengths of model 1 in gas phase.

| Exp. $\lambda$ (nm) | Calcd. $\lambda$ (nm) | Significant contributions              | Osc. strength (a.u.) |
|---------------------|-----------------------|----------------------------------------|----------------------|
| Excitation energies |                       |                                        |                      |
| 390                 | 296                   | HOMO – 15 $\rightarrow$ LUMO + 3 (42%) | 0.0192               |
|                     |                       | HOMO – 14 $\rightarrow$ LUMO + 2 (45%) |                      |
| 390                 | 342                   | HOMO – 10 $\rightarrow$ LUMO (78%)     | 0.0321               |
| 390                 | 324                   | HOMO – 6 $\rightarrow$ LUMO + 2 (75%)  | 0.0393               |
| Emission energies   |                       |                                        |                      |
| 495                 | 530                   | HOMO – 4 $\leftarrow$ LUMO (99%)       | 0.0282               |

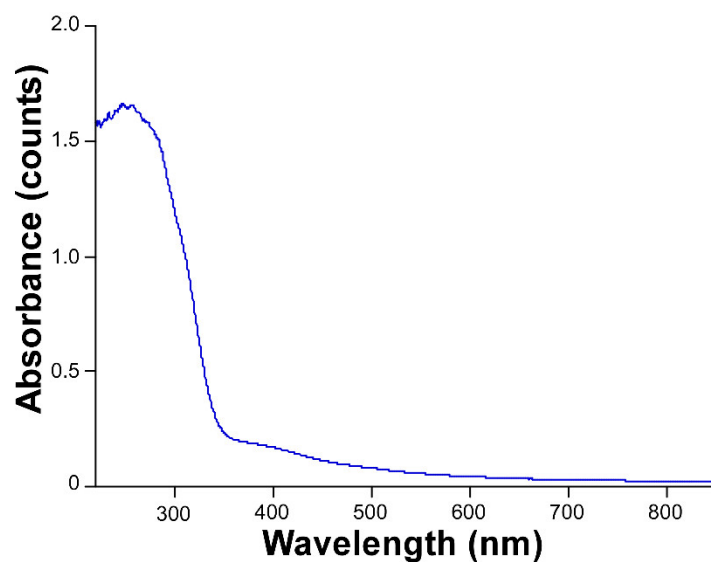

**Figure S14.** Diffuse reflectance spectrum recorded on polycrystalline sample of compound **1** at room temperature.

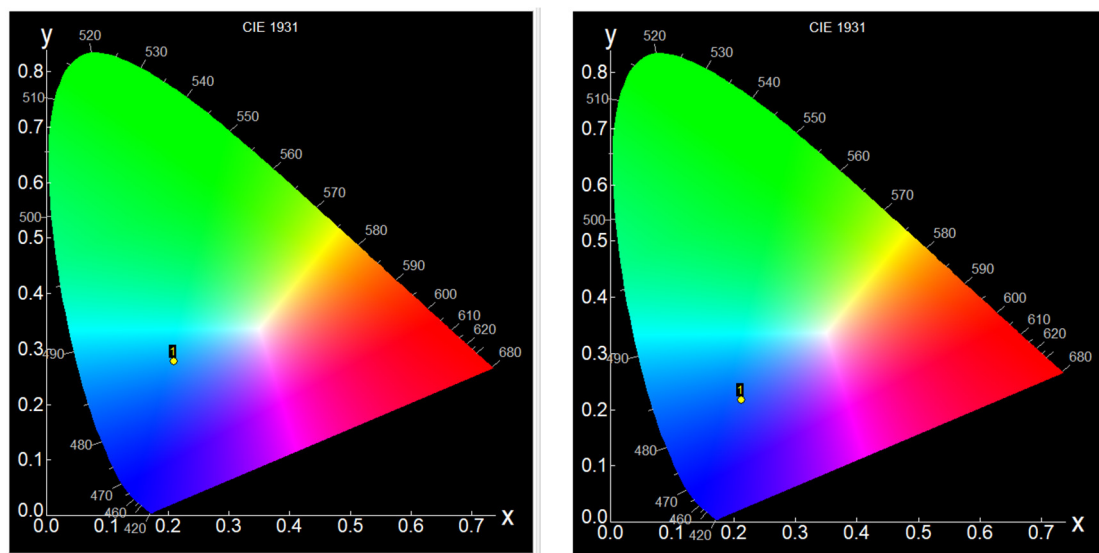

**Figure S15.** Chromaticity diagrams showing the integrated emission pattern for compound **1** (left) and **1<sub>an</sub>** (right) at room temperature.

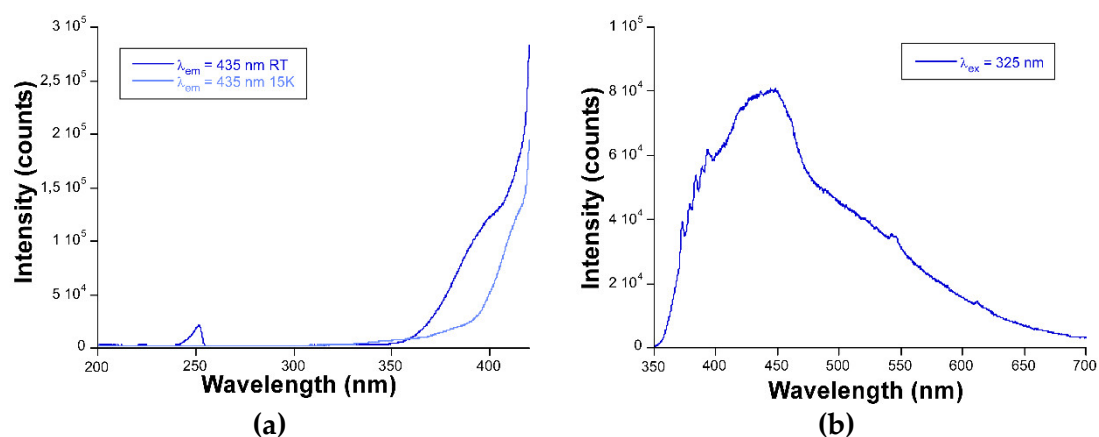

**Figure S16.** (a) Comparative excitation spectra of compound **1an** collected over the main emission line. (b) Emission spectrum of **1an** recorded at 15 K.

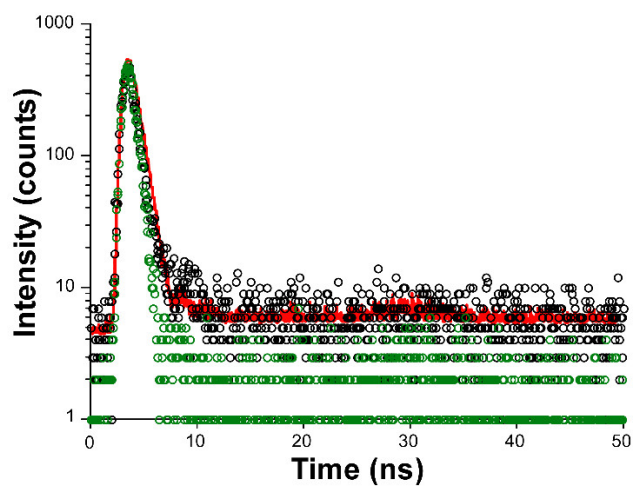

**Figure S17.** Decay curves of compound **1an** recorded at room temperature at an emission wavelength of 445 nm.
